# Supplementary material for: Hyaluronic acid synthesis is required for zebrafish tail fin regeneration
Source: PubMed Central journal article supplement (PMC5313160; doi:10.1371/journal.pone.0171898), 2017-02-16
Supplement: pone.0171898.s011.pdf [file pone.0171898.s011.pdf]

**S1 Table. PCR primers used to amplify gene-specific cDNAs for the *in vitro* transcription of digoxigenin-labeled RNA probes.**

| Gene Symbol    | Primer Sequences (5' to 3')                                                              |
|----------------|------------------------------------------------------------------------------------------|
| <i>aldh1a2</i> | F: ACTGCCAGGAGAGGTGAAGA<br>R: CG <b>TAATACGACTCACTATAGGG</b> GCCTGTTCTAATGCCAGCTC        |
| <i>bcl2l10</i> | F: GCACAGAACCAAATTCCGAT<br>R: CG <b>TAATACGACTCACTATAGGG</b> GAAATCGCTTGGAACCAAAA        |
| <i>cd44</i>    | F: GTCTGCATTGCTGTCCCTCT<br>R: CG <b>TAATACGACTCACTATAGGG</b> TGCTTCTGTAGGGCTGTGTG        |
| <i>dlx5a</i>   | F: AGAGACGCTTGACGCTTGAC<br>R: CG <b>TAATACGACTCACTATAGGG</b> AACGTGCCGGGTGCCTGAAG        |
| <i>fgf20a</i>  | F: ATGGGTGCAGTCGGCGAGC<br>R: CG <b>TAATACGACTCACTATAGGG</b> AAGCTCAGGAACTCGCTCTGGA       |
| <i>fn1b</i>    | F: TCGTGGACTGGAGCCAGGCAT<br>R: CG <b>TAATACGACTCACTATAGGG</b> ACGCAATGCTTCCACCCGCA       |
| <i>has1</i>    | F: TGTGTCTCTGGTCCGAGCCTT<br>R: CG <b>TAATACGACTCACTATAGGG</b> TCCCTCTTTCCTCCCCATTTCTGC   |
| <i>has2</i>    | F: ACTTCAACCTGTGCGCTTGGGG<br>R: CG <b>TAATACGACTCACTATAGGG</b> GCCGGGTCCAGCATGGTGTC      |
| <i>has3</i>    | F: CACACAGAGCAGCACCATCT<br>R: CG <b>TAATACGACTCACTATAGGG</b> GATTGAGCCAACGCAGGTAT        |
| <i>hmmr</i>    | F: CATGGAGCGCCGGGTGTCTG<br>R: CG <b>TAATACGACTCACTATAGGG</b> GCTTCTGCTGGCCCTGCTGT        |
| <i>hyal2</i>   | F: AGAGTGGCGGCCCTTTGGA<br>R: CG <b>TAATACGACTCACTATAGGG</b> CGCCGCTCGATTCCCGTTGT         |
| <i>hyal3</i>   | F: CCGCCTGGCCCTCTACCCTT<br>R: CG <b>TAATACGACTCACTATAGGG</b> GCAGTTCGTCCTCCGGCCC         |
| <i>hyal4</i>   | F: GCACAACTGTTCCAAAGTGAAGGCA<br>R: CG <b>TAATACGACTCACTATAGGG</b> TGATGTGAGTCTGGGGTGGGGT |
| <i>hyal6</i>   | F: AAAGTGGCGACCGCAGTGGG<br>R: CG <b>TAATACGACTCACTATAGGG</b> AGGCTCTGCCATCTGGGGCA        |
| <i>junba</i>   | F: ACGGAGAGAACTTGCGGACT<br>R: CG <b>TAATACGACTCACTATAGGG</b> CTGCTCTTCCAGTGTTTCCC        |
| <i>junbb</i>   | F: ACGTGACCGAGCCGCCCTAT<br>R: CG <b>TAATACGACTCACTATAGGG</b> GGGCCGCAGTGCCGTTCTC         |
| <i>mmp9</i>    | F: CCCTTGGCTCTGGACCAGCCAT<br>R: CG <b>TAATACGACTCACTATAGGG</b> AGTCGCTTGGTAGGCCGAGCT     |
| <i>snx18a</i>  | F: CCCTCTGGCTACAGCATCTC<br>R: CG <b>TAATACGACTCACTATAGGG</b> AGTTGGTGAGGTGTCCTTGG        |
| <i>socs3b</i>  | F: GCTCCCATCTAGCCCTCTCT<br>R: CG <b>TAATACGACTCACTATAGGG</b> CGGTCATCAGACCAGACCTT        |
| <i>vcana</i>   | F: TGAAAAGTGGAGACCGAACC<br>R: CG <b>TAATACGACTCACTATAGGG</b> AGGAAATCCTGGGAGAGTCC        |

The T7 promoter sequence is indicated in blue.
