# Supplementary material for: Hyaluronic acid synthesis is required for zebrafish tail fin regeneration
Source: PubMed Central journal article supplement (PMC5313160; doi:10.1371/journal.pone.0171898), 2017-02-16
Supplement: pone.0171898.s012.pdf [file pone.0171898.s012.pdf]

**S2 Table. Genes that exhibited  $\geq 1.5$ -fold change in expression after zebrafish larval tail amputation** (false discovery rate  $< 0.1$ ; microarray hits ranked according to fold change).

| Entry                    | Gene Symbol           | Gene Description                                                                              | Fold Change |
|--------------------------|-----------------------|-----------------------------------------------------------------------------------------------|-------------|
| <b>Upregulated genes</b> |                       |                                                                                               |             |
| 1                        | <i>il11a</i>          | interleukin 11a                                                                               | +6.27       |
| 2                        | <i>CU469544.1-201</i> | CU469544.1-201                                                                                | +5.70       |
| 3                        | <i>junba</i>          | jun B proto-oncogene a                                                                        | +5.28       |
| 4                        | <i>fgf20a</i>         | fibroblast growth factor 20a                                                                  | +4.83       |
| 5                        | <i>adam8a</i>         | ADAM metallopeptidase domain 8a                                                               | +4.82       |
| 6                        | <i>aldh1a2</i>        | aldehyde dehydrogenase 1 family, member A2                                                    | +3.93       |
| 7                        | <i>irf8</i>           | interferon regulatory factor 8                                                                | +3.78       |
| 8                        | <i>hrh3</i>           | histamine receptor H3                                                                         | +3.74       |
| 9                        | <i>grn1</i>           | granulin 1                                                                                    | +3.72       |
| 10                       | <i>fn1b</i>           | fibronectin 1b                                                                                | +3.71       |
| 11                       | <i>stm</i>            | starmaker                                                                                     | +3.63       |
| 12                       | <i>socs3b</i>         | suppressor of cytokine signaling 3b                                                           | +3.59       |
| 13                       | <i>fstl3</i>          | follistatin-like 3 (secreted glycoprotein)                                                    | +3.57       |
| 14                       | <i>tgm2l</i>          | transglutaminase 2, like                                                                      | +3.37       |
| 15                       | <i>LOC565793</i>      | LOC565793                                                                                     | +3.34       |
| 16                       | <i>pth1a</i>          | parathyroid hormone 1a                                                                        | +3.19       |
| 17                       | <i>slc20a1a</i>       | solute carrier family 20, member 1a                                                           | +3.04       |
| 18                       | <i>LOC100006896</i>   | LOC100006896                                                                                  | +3.03       |
| 19                       | <i>cbx7a</i>          | chromobox homolog 7a                                                                          | +2.85       |
| 20                       | <i>c6</i>             | complement component 6                                                                        | +2.83       |
| 21                       | <i>serpine1</i>       | serpin peptidase inhibitor, clade E (nexin, plasminogen activator inhibitor type 1), member 1 | +2.81       |
| 22                       | <i>mmp13a</i>         | matrix metallopeptidase 13a                                                                   | +2.78       |
| 23                       | <i>vcana</i>          | versican a                                                                                    | +2.75       |
| 24                       | <i>cygb1</i>          | Cytoglobin-1.                                                                                 | +2.73       |
| 25                       | <i>cmklr1</i>         | chemokine-like receptor 1                                                                     | +2.68       |
| 26                       | <i>rrad</i>           | Ras-related associated with diabetes                                                          | +2.66       |
| 27                       | <i>zgc:158446</i>     | zgc:158446                                                                                    | +2.66       |
| 28                       | <i>nuak1a</i>         | NUAK family, SNF1-like kinase, 1a                                                             | +2.65       |
| 29                       | <i>fstb</i>           | follistatin b, transcript variant 1                                                           | +2.53       |
| 30                       | <i>fb73b05.x1</i>     | Zebrafish WashU MPIMG EST Danio rerio cDNA clone                                              | +2.52       |
| 31                       | <i>lepb</i>           | leptin b                                                                                      | +2.46       |
| 32                       | <i>rerglb</i>         | RERG/RAS-like b                                                                               | +2.46       |
| 33                       | <i>f2r</i>            | coagulation factor II (thrombin) receptor                                                     | +2.44       |
| 34                       | <i>bcl2l10</i>        | BCL2-like 10 (apoptosis facilitator)                                                          | +2.43       |
| 35                       | <i>zgc:172120</i>     | zgc:172120                                                                                    | +2.37       |
| 36                       | <i>ecm2</i>           | extracellular matrix protein 2, female organ and adipocyte specific                           | +2.36       |
| 37                       | <i>ctf8</i>           | CTF8, chromosome transmission fidelity factor 8 homolog (S. cerevisiae)                       | +2.36       |
| 38                       | <i>alpi.1</i>         | alkaline phosphatase, intestinal, tandem duplicate 1                                          | +2.35       |
| 39                       | <i>dkk3b</i>          | dickkopf WNT signaling pathway inhibitor 3b                                                   | +2.31       |
| 40                       | <i>htra1b</i>         | HtrA serine peptidase 1b                                                                      | +2.28       |
| 41                       | <i>cyth4b</i>         | Cytohesin-4 (PH, SEC7 and coiled-coil domain-containing protein 4)                            | +2.27       |

|    |                           |                                                                                                       |       |
|----|---------------------------|-------------------------------------------------------------------------------------------------------|-------|
| 42 | <i>LOC562475</i>          | LOC562475                                                                                             | +2.19 |
| 43 | <i>slc16a9a</i>           | solute carrier family 16, member 9a                                                                   | +2.13 |
| 44 | <i>tubb5</i>              | tubulin, beta 5                                                                                       | +2.08 |
| 45 | <i>RZ150A3E03.T7</i>      | Zebrafish Kidney Marrow cDNA library Danio rerio cDNA clone RZ150A3E03 3-, mRNA sequence              | +2.06 |
| 46 | <i>zgc:158334</i>         | hypothetical protein LOC791137                                                                        | +2.02 |
| 47 | <i>mep1a.1</i>            | meprin A, alpha (PABA peptide hydrolase), tandem duplicate 1                                          | +2.02 |
| 48 | <i>sfrp1b</i>             | secreted frizzled-related protein 1b                                                                  | +2.00 |
| 49 | <i>LOC796217</i>          | LOC796217                                                                                             | +1.99 |
| 50 | <i>ass1</i>               | argininosuccinate synthase 1                                                                          | +1.98 |
| 51 | <i>lamc3</i>              | laminin, gamma 3                                                                                      | +1.97 |
| 52 | <i>papss1</i>             | 3'-phosphoadenosine 5'-phosphosulfate synthase 1                                                      | +1.95 |
| 53 | <i>rnpep</i>              | arginyl aminopeptidase (aminopeptidase B)                                                             | +1.94 |
| 54 | <i>htra3a</i>             | HtrA serine peptidase 3a                                                                              | +1.94 |
| 55 | <i>hpcal4</i>             | hippocalcin like 4                                                                                    | +1.94 |
| 56 | <i>entpd4</i>             | ectonucleoside triphosphate diphosphohydrolase 4                                                      | +1.94 |
| 57 | <i>mvp</i>                | major vault protein                                                                                   | +1.93 |
| 58 | <i>furina</i>             | furin (paired basic amino acid cleaving enzyme) a                                                     | +1.93 |
| 59 | <i>flvcr2b</i>            | feline leukemia virus subgroup C cellular receptor family, member 2b                                  | +1.92 |
| 60 | <i>chsy1</i>              | chondroitin sulfate synthase 1                                                                        | +1.89 |
| 61 | <i>mf145a</i>             | ring finger protein 145a                                                                              | +1.88 |
| 62 | <i>mmp9</i>               | matrix metalloproteinase 9                                                                            | +1.88 |
| 63 | <i>aldh1a3</i>            | aldehyde dehydrogenase 1 family, member A3                                                            | +1.86 |
| 64 | <i>pdia5</i>              | Protein disulfide-isomerase A5 precursor (EC 5.3.4.1) (Protein disulfide isomerase-related protein)   | +1.84 |
| 65 | <i>LOC571588</i>          | LOC571588                                                                                             | +1.84 |
| 66 | <i>si:ch211-241e1.3</i>   | novel protein laminin subunit alpha-3 (LAMA3)                                                         | +1.84 |
| 67 | <i>cmpk</i>               | cytidylate kinase                                                                                     | +1.82 |
| 68 | <i>LOC100002292</i>       | LOC100002292                                                                                          | +1.80 |
| 69 | <i>pltp</i>               | phospholipid transfer protein                                                                         | +1.80 |
| 70 | <i>scg3</i>               | secretogranin III                                                                                     | +1.79 |
| 71 | <i>tubb6</i>              | tubulin, beta 6 class V                                                                               | +1.79 |
| 72 | <i>gad45ga</i>            | growth arrest and DNA-damage-inducible, gamma a                                                       | +1.79 |
| 73 | <i>clu</i>                | clusterin                                                                                             | +1.79 |
| 74 | <i>ptprua</i>             | protein tyrosine phosphatase, receptor type, U, a                                                     | +1.79 |
| 75 | <i>scg3</i>               | Secretogranin-3 precursor (Secretogranin III) (SgIII)                                                 | +1.78 |
| 76 | <i>si:ch211-137i24.10</i> | novel protein similar to vertebrate transmembrane 4 L six family member 4 (TM4SF4)                    | +1.78 |
| 77 | <i>fyb</i>                | FYN Binding protein                                                                                   | +1.77 |
| 78 | <i>timp2b</i>             | Metalloproteinase inhibitor 2 precursor (TIMP-2) (Tissue inhibitor of metalloproteinases 2) (CSC-21K) | +1.76 |
| 79 | <i>ehhadh</i>             | enoyl-CoA, hydratase/3-hydroxyacyl CoA dehydrogenase                                                  | +1.73 |
| 80 | <i>itga5</i>              | integrin, alpha 5 (fibronectin receptor, alpha polypeptide)                                           | +1.73 |
| 81 | <i>creld2</i>             | cysteine-rich with EGF-like domains 2                                                                 | +1.73 |
| 82 | <i>has3</i>               | hyaluronan synthase 3                                                                                 | +1.73 |
| 83 | <i>adamts15a</i>          | ADAM metalloproteinase with thrombospondin type 1, motif, 15a                                         | +1.71 |
| 84 | <i>cpn1</i>               | carboxypeptidase N, polypeptide 1                                                                     | +1.70 |
| 85 | <i>mamdc2a</i>            | MAM domain containing 2a                                                                              | +1.67 |
| 86 | <i>dpp3</i>               | dipeptidyl-peptidase 3                                                                                | +1.67 |
| 87 | <i>col14a1a</i>           | collagen, type XIV, alpha 1a                                                                          | +1.65 |

|                            |                          |                                                                                                                                  |       |
|----------------------------|--------------------------|----------------------------------------------------------------------------------------------------------------------------------|-------|
| 88                         | <i>rasgef1bb</i>         | RasGEF domain family, member 1Bb                                                                                                 | +1.65 |
| 89                         | <i>homeza</i>            | homeobox and leucine zipper encoding a                                                                                           | +1.64 |
| 90                         | <i>tnni1b</i>            | troponin I type 1b (skeletal, slow)                                                                                              | +1.59 |
| 91                         | <i>rad52</i>             | RAD52 homolog, DNA repair protein                                                                                                | +1.59 |
| 92                         | <i>snx18a</i>            | sorting nexin 18a                                                                                                                | +1.58 |
| 93                         | <i>zgc:77147</i>         | <i>zgc:77147</i>                                                                                                                 | +1.57 |
| 94                         | <i>lman1</i>             | lectin, mannose-binding, 1                                                                                                       | +1.56 |
| 95                         | <i>slc25a25a</i>         | solute carrier family 25 (mitochondrial carrier; phosphate carrier), member 25a                                                  | +1.52 |
| 96                         | <i>b4galt7</i>           | xylosylprotein beta 1,4-galactosyltransferase, polypeptide 7 (galactosyltransferase I)                                           | +1.52 |
| 97                         | <i>Q1LYC0_DANRE</i>      | Novel protein (Fragment)                                                                                                         | +1.51 |
| <b>Downregulated genes</b> |                          |                                                                                                                                  |       |
| 1                          | <i>si:busm1-71b9.3</i>   | si:busm1-71b9.3 (si:busm1-71b9.3), misc RNA                                                                                      | -3.21 |
| 2                          | <i>si:busm1-71b9</i>     | novel protein similar to zebrafish epithelial cadherin 1 (cdh1)                                                                  | -3.01 |
| 3                          | <i>dkk1b</i>             | dickkopf WNT signaling pathway inhibitor 1b                                                                                      | -2.96 |
| 4                          | <i>aanat2</i>            | arylalkylamine N-acetyltransferase                                                                                               | -2.76 |
| 5                          | <i>zgc:153154</i>        | <i>zgc:153154</i>                                                                                                                | -2.70 |
| 6                          | <i>astl</i>              | astacin-like metallo-endopeptidase (M12 family)                                                                                  | -2.42 |
| 7                          | <i>fq27b03.x3</i>        | zebrafish adult brain cDNA clone IMAGE:4832573 3-, mRNA sequence                                                                 | -2.40 |
| 8                          | <i>prf1.5</i>            | perforin 1.5                                                                                                                     | -2.39 |
| 9                          | <i>fx06c11.x1</i>        | Gong zebrafish ovary cDNA clone IMAGE:5619069 3-, mRNA sequence                                                                  | -2.26 |
| 10                         | <i>si:ch211-238g23.1</i> | novel protein kinase domain containing protein                                                                                   | -2.23 |
| 11                         | <i>LOC100004613</i>      | LOC100004613                                                                                                                     | -2.22 |
| 12                         | <i>aqp10a</i>            | aquaporin 10a                                                                                                                    | -2.20 |
| 13                         | <i>fv44e07.x1</i>        | Sugano SJD adult male cDNA clone IMAGE:5411413 3- similar to SW:PEX_MOUSE P70669 METALLOENDOPEPTIDASE HOMOLOG PEX, mRNA sequence | -2.16 |
| 14                         | <i>si:dkeyp-79b7.4</i>   | novel protein                                                                                                                    | -2.15 |
| 15                         | <i>ucp1</i>              | uncoupling protein 1                                                                                                             | -2.07 |
| 16                         | <i>zgc:110712</i>        | novel keratin protein ( <i>zgc:110712</i> )                                                                                      | -2.04 |
| 17                         | <i>atp8b3</i>            | ATPase, aminophospholipid transporter, class I, type 8B, member 3                                                                | -2.03 |
| 18                         | <i>fjx1</i>              | four jointed box 1                                                                                                               | -2.02 |
| 19                         | <i>slc10a1</i>           | solute carrier family 10 (sodium/bile acid cotransporter), member 1                                                              | -1.97 |
| 20                         | <i>lamb2l</i>            | laminin, beta 2-like                                                                                                             | -1.94 |
| 21                         | <i>zgc:113307</i>        | <i>zgc:113307</i>                                                                                                                | -1.94 |
| 22                         | <i>LOC556634</i>         | LOC556634                                                                                                                        | -1.93 |
| 23                         | <i>LOC100001952</i>      | LOC100001952                                                                                                                     | -1.87 |
| 24                         | <i>smim8</i>             | small integral membrane protein 8                                                                                                | -1.87 |
| 25                         | <i>gyg1b</i>             | glycogenin 1b                                                                                                                    | -1.84 |
| 26                         | <i>anxa1c</i>            | annexin A1c                                                                                                                      | -1.83 |
| 27                         | <i>egfl7</i>             | EGF-like-domain, multiple 7                                                                                                      | -1.83 |
| 28                         | <i>tm7sf2</i>            | transmembrane 7 superfamily member 2                                                                                             | -1.83 |
| 29                         | <i>Q1MT48_DANRE</i>      | Novel protein similar to vertebrate transducin-like enhancer family (E(Sp1) homolog Drosophila) (Fragment)                       | -1.79 |
| 30                         | <i>si:dkey-73p2.2</i>    | si:dkey-73p2.2                                                                                                                   | -1.78 |
| 31                         | <i>eif43bp3</i>          | eukaryotic translation initiation factor 4E binding protein 3                                                                    | -1.75 |
| 32                         | <i>LOC560375</i>         | LOC560375                                                                                                                        | -1.72 |

|    |                        |                                                                       |       |
|----|------------------------|-----------------------------------------------------------------------|-------|
| 33 | <i>scn4ba</i>          | sodium channel, voltage-gated, type IV, beta a                        | -1.70 |
| 34 | <i>tuba7l</i>          | tubulin, alpha 7 like                                                 | -1.70 |
| 35 | <i>p2rx1</i>           | purinergic receptor P2X, ligand-gated ion channel, 1                  | -1.64 |
| 36 | <i>ankrd22</i>         | ankyrin repeat domain 22                                              | -1.64 |
| 37 | <i>LOC100003522</i>    | LOC100003522                                                          | -1.61 |
| 38 | <i>si:dkeyp-32b1.1</i> | novel protein similar to vertebrate lysyl oxidase-like 2 (LOXL2)      | -1.61 |
| 39 | <i>si:dkey-98p3.2</i>  | si:dkey-98p3.2                                                        | -1.61 |
| 40 | <i>phex</i>            | phosphate regulating endopeptidase homolog, X-linked                  | -1.60 |
| 41 | <i>dpt</i>             | dermatopontin                                                         | -1.59 |
| 42 | <i>ugt5a5</i>          | UDP glucuronosyltransferase 5 family, polypeptide A5                  | -1.58 |
| 43 | <i>slc43a1b</i>        | solute carrier family 43 (amino acid system L transporter), member 1b | -1.58 |
| 44 | <i>zgc:92360</i>       | hypothetical protein LOC436988                                        | -1.52 |
| 45 | <i>tmtopsb</i>         | teleost multiple tissue opsin b                                       | -1.50 |
